# Supplementary material for: UV-Manipulated wettability between superhydrophobicity and superhydrophilicity on a transparent and conductive SnO2 nanorod film
Source: Royal Society of Chemistry journal article supplement (doi:10.1039/b603634a), 2006-01-01
Supplement: b603634a.pdf [file b603634a.pdf]

## Supplementary Information

### UV-Manipulated Wettability between Superhydrophobicity and Superhydrophilicity on Transparent and Conductive SnO<sub>2</sub> Nanorod Film

Weiqin Zhu,<sup>a, b</sup> Xinjian Feng,<sup>a, b</sup> Lin Feng<sup>c</sup> and Lei Jiang\*<sup>a, d</sup>

<sup>a</sup> Center for Molecular Sciences, Institute of Chemistry, Chinese Academy of Science, Beijing 100080, P. R. China. Fax: (+86) 10 8262 7566; Tel: (+86) 10 8262 1396; E-mail:jianglei@iccas.ac.cn

<sup>b</sup> Graduate School of Chinese Academy of Science, Beijing 100080, P. R. China.

<sup>c</sup> Department of Chemistry, Tsinghua University, Beijing 100084, P. R. China.

<sup>d</sup> National Center for Nanoscience and Nanotechnology, Beijing 100080, P. R. China.

#### Instruments employed for characterizations

The surface morphology of the film was characterized by FE-SEM (JSM-6700F). The fine structure of the nanorods was characterized by HRTEM (H-9000 NAR). The crystallographic phase of the nanorods was characterized by XRD (Rigaku D/max 2500 using Cu K $\alpha$  radiation). Water contact angles were measured with OCA20 (Dataphysics) at room temperature. The conductivity of the films was examined with conducting AFM using a Seiko SPI-3800N scanning probe microscope. The transmitting spectra of the films were measured by U-3010 spectrophotometer. The XPS analysis was performed on a VG Scientific ESCALab220i-XL spectrometer.

### XPS analysis

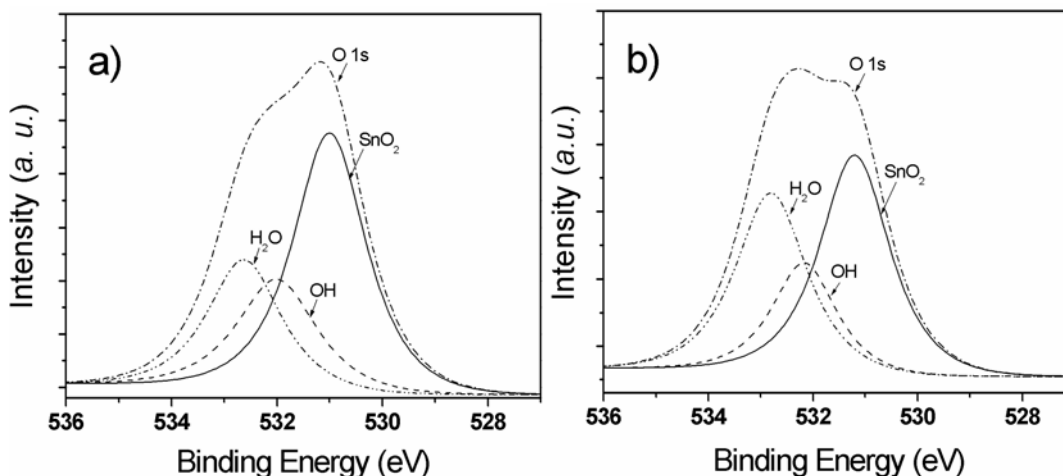

**Figure S1** O 1s spectra of the SnO<sub>2</sub> nanorod film a) before and b) after UV irradiation

Figure S1 a) and b) are the O 1s spectra of the as-prepared SnO<sub>2</sub> nanorod film before and after UV-irradiation, respectively. The broad shoulder at the higher binding energy side of the main O 1s peak of the SnO<sub>2</sub> films can be fitted with two peaks. For these two peaks, the one at higher binding energy side corresponds to the physically adsorbed water molecule (H<sub>2</sub>O), the other at lower binding energy side corresponds to the dissociatively adsorbed water molecule (OH). Comparing these two spectra, it can be found that the shoulder increased remarkably after UV-irradiation, which is caused by the increasing of the intensities of the two fitted peaks. This indicates that the adsorption of water molecules on the SnO<sub>2</sub> surface is enhanced by UV-irradiation, which induces a highly hydrophilic SnO<sub>2</sub> surface.

### Details for conductive property measurement

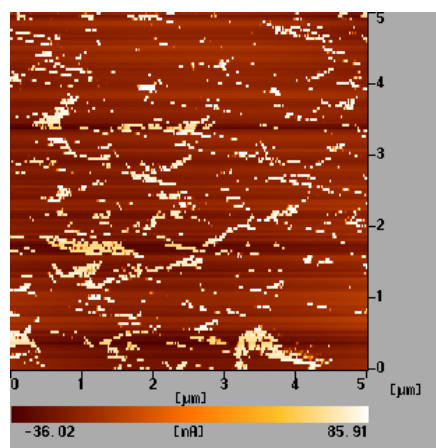

**Figure S2.** simultaneous current scanning image of the SnO<sub>2</sub> nanorod films

For the investigation of conductive property with conducting AFM, the films were deposited on FTO glass and the sample was fixed on a metal plate with conductive gel to ensure an ohmic electrical contact between the sample and the sample stage on a piezo scanner. The simultaneous current scanning image of the SnO<sub>2</sub> nanorod films at a bias voltage of 2V is shown in Figure S2. The bright areas in the current image imply a high conductivity. The  $I$ - $V$  curve shown in Fig. 5a represents the typical  $I$ - $V$  behavior of the bright sites in the current scanning image.
